# Supplementary material for: Preparation and Characterization of Eco-Friendly Transparent Antibacterial Starch/Polyvinyl Alcohol Materials for Use as Wound-Dressing
Source: MDPI journal article supplement (doi:10.3390/mi13060960), 2022-06-17
Supplement: s1 [file s1]

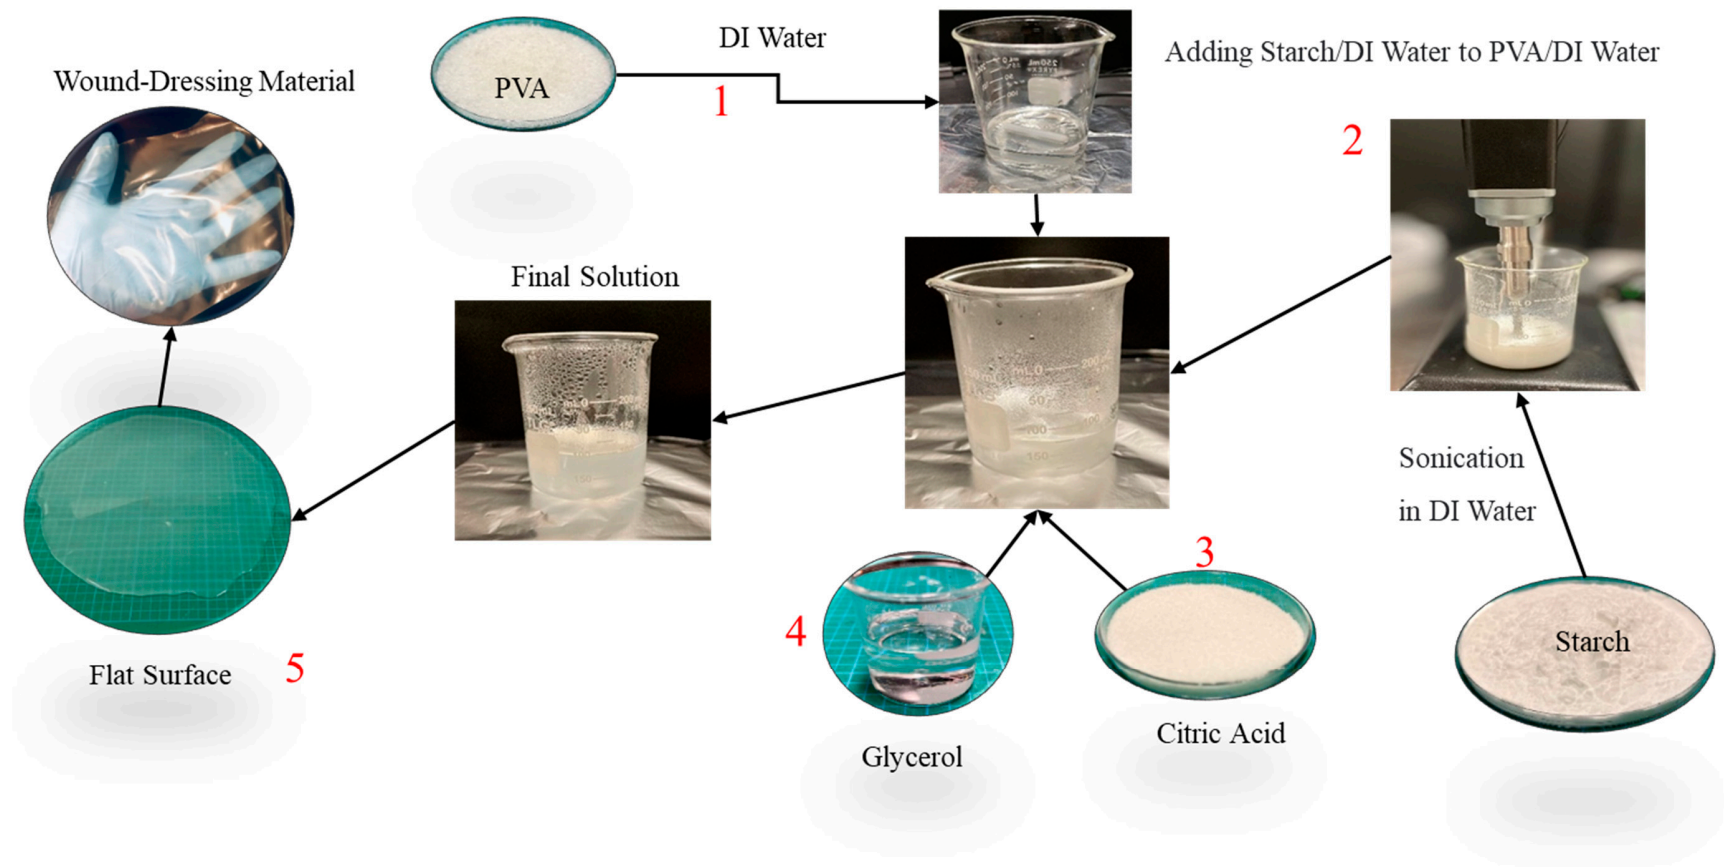

Figure S1. Starch-based wound dressing preparation steps.

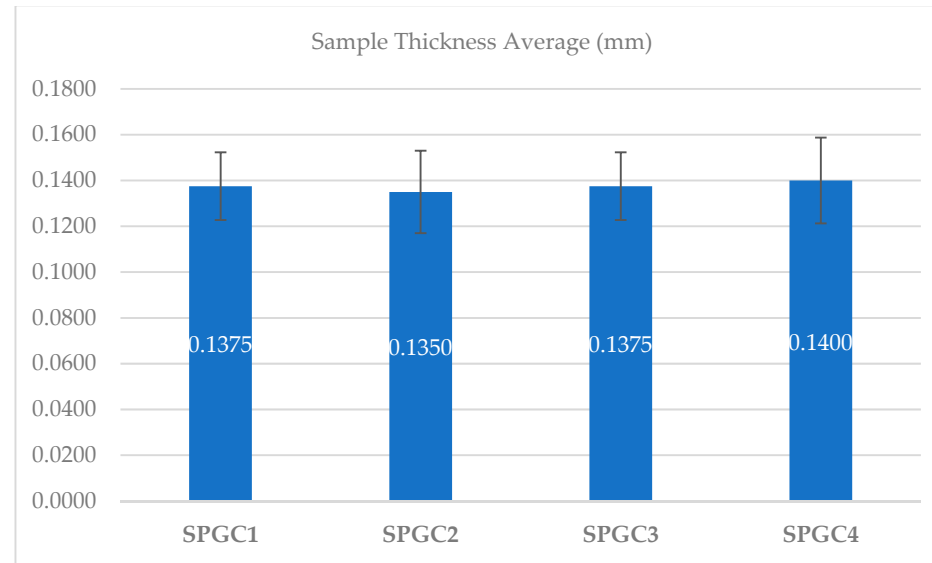

Figure S2. The average thickness of the samples (mm).
